# Supplementary material for: Transcriptomic Analysis of Tobacco Plants in Response to Whitefly Infection
Source: MDPI journal article supplement (doi:10.3390/genes14081640), 2023-08-18
Supplement: s1 [file s1]

## Supplementary Figure

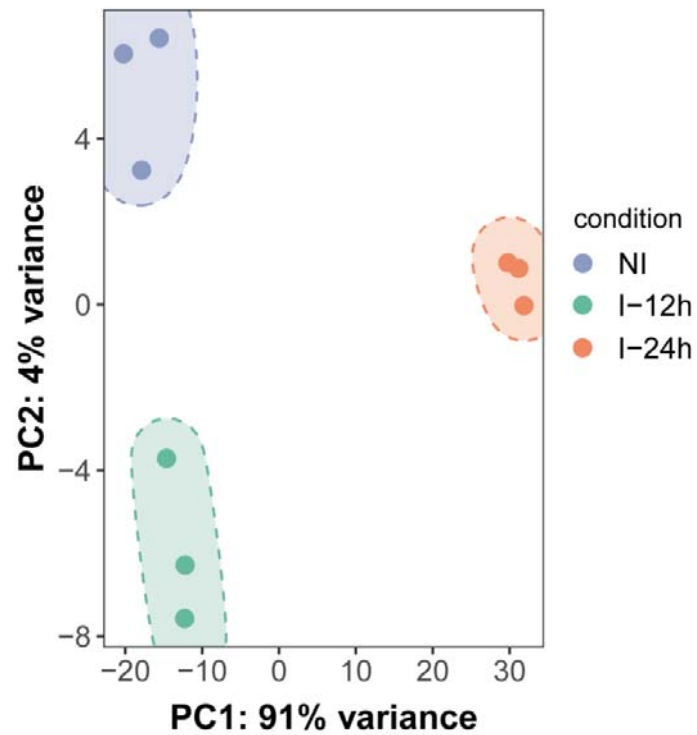

**Fig. S1 Principal component analysis (PCA) of gene expression patterns in tobacco plants with different treatments.** The first two principal components (PC1 and PC2) based on transcriptomic results are shown.

**Table S1. Ten genes utilized for qRT-PCR validation**

| Gene name      | Annotation                                                    |
|----------------|---------------------------------------------------------------|
| 0000318g0020.1 | Zinc finger CCCH domain-containing protein                    |
| 0000722g0100.1 | Ribulose-1,5-bisphosphate carboxylase_oxygenase<br>activase 1 |
| 0000306g0200.1 | ABC transporter G family member 40                            |
| 0000202g0460.1 | MYB transcription factor REVEILLE 8                           |
| 0004821g0020.1 | MYB transcription factor REVEILLE 1                           |
| 0000116g0500.1 | Late embryogenesis abundant protein 5                         |
| 0000786g0090.1 | L-ascorbate peroxidase                                        |
| 0003380g0010.1 | Cryptochrome 1b                                               |
| 0002820g0100.1 | Late embryogenesis abundant protein 5                         |
| 0004814g0010.1 | protein kinase At1g79600                                      |

**Table S2. Primers used in this study**

| Genes                          | Forward primer (5'-3') | Reverse primer (5'-3') |
|--------------------------------|------------------------|------------------------|
| <b>Primers used in qRT-PCR</b> |                        |                        |
| Nttubulin                      | AAGTACATGGCTTGCTGCCT   | ATCAATGCGCGAGAAGACCT   |
| 0000318g0020.1                 | GTGGATCGTTGAGTCTGAA    | GGTAGTTGGAAGGCTCATAA   |
| 0000722g0100.1                 | CAATACACTGTCAACAACCA   | TTCTCCATACGACCATCAC    |
| 0000306g0200.1                 | CAAGGTGCTGGTGAAGATA    | GATGTCGCCGTCAATGTA     |
| 0000202g0460.1                 | CTTGAAGGTCCAGAAGAATG   | AGAGTACAGAAGTGTCATCC   |
| 0004821g0020.1                 | GACAGAAGAAGAGCACAGAA   | GCATCACCCTATTAGATTCAC  |
| 0000116g0500.1                 | CTCCACAATCAATTCCTTCC   | TATCCACGCCTGCTAAGA     |
| 0000786g0090.1                 | GCTTGCTGCTGCTATGAA     | CTTCTCTACATTACCACCACAT |
| 0003380g0010.1                 | GAAGTGAAGATGAAGAATCCTC | TCCAATCCTCCTACTTACCA   |

---

0002820g0100.1

CAGGTGGAGTGAGAGGAT

TTGTGGTTCAAGAGCATCT

0004814g0010.1

CGATTGGAGCAAGGTGAT

GAAGGCATACGGATGGAAT

---
